## **S3 Questionnaire. Checklist of observational accuracy**

### **Datos personales (EN MAYÚSCULAS)**

Apellidos (en mayúsculas):

Nombre:

ID:

Fecha:

### **Instrucciones**

A continuación se presenta un listado de 155 sucesos y acciones que pueden haber sucedido o no en el video.

Por favor, lea detenidamente cada pregunta y pregúntese *si ese acontecimiento ocurre*.

Marque con una cruz en la casilla **SÍ** si usted cree que dicho suceso o acciones ha sucedido en el video; marque la casilla **NO** si usted cree que no ha sucedido; o deje la casilla en **blanco** si no está seguro de si ha sucedido o no dicha acción.

Recuerde que este cuestionario es parte de la investigación en la que está participando y su único objetivo es analizar los conocimientos que adquirirán con el programa de formación.

Por favor, **lea con atención las preguntas antes de responderlas.**

|                                                                                                                                                                            | SI | NO |
|----------------------------------------------------------------------------------------------------------------------------------------------------------------------------|----|----|
| 1 El protagonista se llama Mauro.                                                                                                                                          |    |    |
| 2 Mauro tiene barba, cejas pobladas y ojos oscuros.                                                                                                                        |    |    |
| 3 Las cortinas de separación de secciones son blancas.                                                                                                                     |    |    |
| 4 Mauro recorre todo el avión persiguiendo a Luisa para hablar con ella.                                                                                                   |    |    |
| 5 La sobrecargo se llama Luisa.                                                                                                                                            |    |    |
| 6 El niño está jugando con el teléfono móvil.                                                                                                                              |    |    |
| 7 El comandante informa que el responsable del imprevisto se hará cargo de los billetes y de todos los gastos ocasionados.                                                 |    |    |
| 8 La azafata le sirve una bebida al hombre que inicia la historia del secuestro.                                                                                           |    |    |
| 9 Los asientos de primera clase son marrones-beige.                                                                                                                        |    |    |
| 10 El azafato lleva chaleco.                                                                                                                                               |    |    |
| 11 El comandante es calvo.                                                                                                                                                 |    |    |
| 12 Luisa le pone dos tapones de algodón en la nariz al niño para que deje de sangrar.                                                                                      |    |    |
| 13 Mauro presiona y chantajea al comandante y copiloto con la difusión por televisión, periódicos, radio e internet de la noticia del secuestro (sea o no real).           |    |    |
| 14 Luisa le sirve el menú de pasta de Mauro.                                                                                                                               |    |    |
| 15 Los pasajeros levantan su mano con el teléfono móvil en ella para entregárselo a la azafata.                                                                            |    |    |
| 16 El comandante informa que la aerolínea se hará cargo de la devolución de los billetes y de los gastos ocasionados por regresar al aeropuerto de origen, Madrid-Barajas. |    |    |
| 17 Mauro va al baño del avión.                                                                                                                                             |    |    |
| 18 El hombre sentado en primera clase tiene barba, lleva corbata y chaqueta.                                                                                               |    |    |
| 19 Un hombre con perilla y camisa rojo-teja de manga corta informa del secuestro al protagonista.                                                                          |    |    |
| 20 En primera clase, cada asiento tiene su propia pantalla.                                                                                                                |    |    |
| 21 El azafato lleva camisa blanca y corbata.                                                                                                                               |    |    |
| 22 Mauro se une al grupo que está decidiendo si actuar o no.                                                                                                               |    |    |
| 23 Mauro usa una cerilla para encender el cigarro en el baño.                                                                                                              |    |    |
| 24 Después del “accidente” del niño, Luisa se marcha sin mediar palabra con Mauro.                                                                                         |    |    |
| 25 La madre del niño lo regaña por patear el asiento del viajero de delante (Mauro).                                                                                       |    |    |
| 26 La azafata y el azafato están en la puerta de la cabina del comandante.                                                                                                 |    |    |
| 27 Las azafatas llevan zapatos de tacón.                                                                                                                                   |    |    |

|    |                                                                                                                                                             |  |  |
|----|-------------------------------------------------------------------------------------------------------------------------------------------------------------|--|--|
| 28 | De la mayoría de los armarios superiores para guardar el equipaje de mano, cuelgan las asas de bolsos y maletas de los pasajeros; así como, ropa de abrigo. |  |  |
| 29 | Mauro trata de aclarar con Luisa lo sucedido durante el vuelo (comida y niño).                                                                              |  |  |
| 30 | Luisa recorre todo el pasillo del avión sin atender las llamadas de los pasajeros.                                                                          |  |  |
| 31 | El niño llama a su madre al recibir el golpe.                                                                                                               |  |  |
| 32 | Al presentarse, Germán da dos besos a Mauro.                                                                                                                |  |  |
| 33 | La noticia del secuestro llega hasta los pasajeros de primera clase.                                                                                        |  |  |
| 34 | El azafato se marcha del lugar donde transcurre la conversación entre Mauro y Luisa.                                                                        |  |  |
| 35 | El niño es rubio de pelo medio-largo, lleva polo blanco y pantalón corto azul marino.                                                                       |  |  |
| 36 | La consola de información de la ruta se modifica, el avión apunta de nuevo rumbo a España.                                                                  |  |  |
| 37 | Luisa tiene un ojo morado y el labio hinchado.                                                                                                              |  |  |
| 38 | El polo del niño permanece manchado de sangre todo el vuelo.                                                                                                |  |  |
| 39 | Una pasajera usa una almohada con funda para dormir.                                                                                                        |  |  |
| 40 | Tras el incidente del niño, Mauro está leyendo un libro.                                                                                                    |  |  |
| 41 | Mauro informa al comandante y al copiloto que todos los pasajeros piensan que ellos, junto con la tripulación, han secuestrado el avión.                    |  |  |
| 42 | Cuando Mauro se cambia de asiento, la mujer de al lado está durmiendo.                                                                                      |  |  |
| 43 | Luisa entra en el baño porque salta la alarma del sistema de detección de humo.                                                                             |  |  |
| 44 | La tripulación (sobrecargo, azafata y azafato) ajenos a la noticia del secuestro, están hablando y riéndose entre ellos.                                    |  |  |
| 45 | Mauro lleva un reloj en su mano izquierda.                                                                                                                  |  |  |
| 46 | Cuando Mauro está en el baño, se ve una pulsera en su muñeca derecha.                                                                                       |  |  |
| 47 | Antes de que la azafata descubra el motín, las pantallas muestran la ruta de vuelo.                                                                         |  |  |
| 48 | Luisa invita al niño y a su madre a pasar a primera clase.                                                                                                  |  |  |
| 49 | Mauro exige hablar con el comandante.                                                                                                                       |  |  |
| 50 | La noticia del secuestro comienza a extenderse por todos los pasajeros del avión.                                                                           |  |  |
| 51 | Luisa y la azafata sirven la comida a todos los pasajeros del avión.                                                                                        |  |  |
| 52 | Las azafatas llevan un pañuelo al cuello trabado con un alfiler.                                                                                            |  |  |
| 53 | Los asientos del avión son azules con el emblema de la compañía en amarillo.                                                                                |  |  |
| 54 | Mauro patea con los dos pies el asiento del niño desde atrás.                                                                                               |  |  |

|    |                                                                                                                                                |  |  |
|----|------------------------------------------------------------------------------------------------------------------------------------------------|--|--|
| 55 | Mauro está durmiendo cuando el niño empieza a patear su asiento.                                                                               |  |  |
| 56 | Al tratar de impedir que la lleven a la cabina, a Luisa se le ve la ropa interior.                                                             |  |  |
| 57 | La azafata no lleva chaleco como Luisa.                                                                                                        |  |  |
| 58 | Uno de los pasajeros confabuladores, el que viste camisa roja de manga corta, (German) se suena varias veces antes de tomar asiento.           |  |  |
| 59 | El comandante informa que la temperatura exterior en Miami es de 35°.                                                                          |  |  |
| 60 | Mauro enciende un cigarro dentro del baño del avión mientras está sentado en el inodoro.                                                       |  |  |
| 61 | El comandante tiene barba.                                                                                                                     |  |  |
| 62 | Hay extintores en las paredes de diferentes puntos del avión.                                                                                  |  |  |
| 63 | Mauro se muestra nervioso, tras conocer que regresan a Madrid.                                                                                 |  |  |
| 64 | Cuando Luisa localiza a los pasajeros, éstos la están amenazando con diversos objetos (muleta, tenedor, extintor, cafetera, cazo, pinzas,...). |  |  |
| 65 | Al entrar la azafata en la zona turista, los pasajeros dejan de hablar y la miran aterrorizados.                                               |  |  |
| 66 | La azafata coloca y acomoda la almohada del pasajero que comenzó la historia del secuestro.                                                    |  |  |
| 67 | Luisa recoge todos los teléfonos móviles.                                                                                                      |  |  |
| 68 | Tras la noticia del secuestro, Mauro enciende su móvil para llamar por teléfono.                                                               |  |  |
| 69 | Un pasajero de traje y barba comienza a crear el pánico informando de que una banda tiene secuestrado el avión.                                |  |  |
| 70 | La azafata es pelirroja.                                                                                                                       |  |  |
| 71 | El niño está sangrando.                                                                                                                        |  |  |
| 72 | El avión va lleno, no quedan sitios libres en la zona turista.                                                                                 |  |  |
| 73 | Mauro se preocupa por el estado del niño.                                                                                                      |  |  |
| 74 | Antes de aterrizar, Mauro está disfrutando de una bebida con hielo y limón.                                                                    |  |  |
| 75 | Mauro trata de ayudar del niño.                                                                                                                |  |  |
| 76 | Luisa ordena a los pasajeros que apaguen sus móviles o que se los entreguen enseguida.                                                         |  |  |
| 77 | Al golpearse el niño y gritar llamando a su madre, los demás pasajeros del avión se asustan.                                                   |  |  |
| 78 | El comandante informa que regresan al aeropuerto de Madrid-Barajas por motivos de seguridad.                                                   |  |  |
| 79 | El niño está abrigado con una manta marrón en su asiento de primera clase.                                                                     |  |  |
| 80 | Mauro trata de evitar por todos los medios que los pasajeros negocien con la tripulación y/o hablen con ellos.                                 |  |  |

|     |                                                                                                                                        |  |  |
|-----|----------------------------------------------------------------------------------------------------------------------------------------|--|--|
| 81  | Luisa regaña a Mauro por haber agredido a un niño de 5 años.                                                                           |  |  |
| 82  | Cuando Mauro se cambia de asiento, la mujer de al lado tiene puestos los auriculares.                                                  |  |  |
| 83  | La noticia de que el avión está bajo el control de una banda se extendió por el avión sin que ningún pasajero se pusiera en pie.       |  |  |
| 84  | El comandante indica que va a aterrizar en el aeropuerto de Miami y pide disculpas por los acontecimientos sucedidos durante el vuelo. |  |  |
| 85  | Mauro informa a sus compañeros de revuelta que la tripulación ha pegado a un niño.                                                     |  |  |
| 86  | El niño no se quita las orejas de Mickey Mouse durante el vuelo.                                                                       |  |  |
| 87  | Luisa se levanta y se dirige a la zona turista, alguien ha tocado el timbre.                                                           |  |  |
| 88  | Mauro informa al hombre de la perilla que los miembros de la tripulación son los secuestradores.                                       |  |  |
| 89  | La mujer del asiento de al lado de Mauro tiene el pelo castaño oscuro.                                                                 |  |  |
| 90  | Suena un teléfono de servicio del avión situado en primera clase.                                                                      |  |  |
| 91  | Antes de aceptar pedir un solo menú, Mauro agarra a Luisa de la mano.                                                                  |  |  |
| 92  | Mauro habla de la rabia, la describe.                                                                                                  |  |  |
| 93  | La azafata lleva una alianza en la mano izquierda.                                                                                     |  |  |
| 94  | Luisa le propina un puñetazo a Mauro.                                                                                                  |  |  |
| 95  | Uno de los pasajeros de primera clase indica que el vino blanco está muy bueno.                                                        |  |  |
| 96  | El comandante está jugando al solitario con un ordenador portátil.                                                                     |  |  |
| 97  | Luisa le pide al comandante regresar al aeropuerto de origen, Madrid-Barajas.                                                          |  |  |
| 98  | Al igual que el resto de pasajeros, Mauro emplea algún utensilio del avión como arma.                                                  |  |  |
| 99  | Mauro lleva una camisa azul claro y pantalón beige                                                                                     |  |  |
| 100 | Luisa informa a Mauro que los pasajeros no pueden acceder a la cabina del comandante.                                                  |  |  |
| 101 | Por la noche, en las pantallas se proyecta una película.                                                                               |  |  |
| 102 | Mauro se ofrece a solucionar el mal entendido siempre y cuando vuelvan a dar la vuelta al avión en dirección a Miami.                  |  |  |
| 103 | Luisa informa al comandante del incidente entre Mauro y el niño.                                                                       |  |  |
| 104 | Germán lleva a la azafata amordazada con su propio pañuelo.                                                                            |  |  |
| 105 | El comandante llama a la azafata informándola de que hay interferencias en el instrumental de vuelo.                                   |  |  |
| 106 | Los dos pilotos tienen el mismo rango, llevan los mismos galones.                                                                      |  |  |
| 107 | El azafato detiene al protagonista evitando que se vaya detrás de la sobrecarga.                                                       |  |  |

|     |                                                                                             |  |  |
|-----|---------------------------------------------------------------------------------------------|--|--|
| 108 | Siguiendo a Luisa, Mauro llega hasta la zona reservada para la tripulación.                 |  |  |
| 109 | El grupo de confabuladores disimula al llegar una de las azafatas (vuelven a su asiento).   |  |  |
| 110 | Luisa comienza a avanzar por el avión sin ver a ningún pasajero.                            |  |  |
| 111 | Uno de los pasajeros es de nacionalidad asiática.                                           |  |  |
| 112 | Luisa invita a Mauro a sentarse en su asiento y disfrutar del resto del vuelo (ironía).     |  |  |
| 113 | El avión está provisto de pantallas.                                                        |  |  |
| 114 | Mauro intenta parar y hablar con la azafata.                                                |  |  |
| 115 | El niño golpea con los pies el asiento de Mauro.                                            |  |  |
| 116 | Mauro le entrega a la azafata el móvil con la mano derecha.                                 |  |  |
| 117 | Luisa y la azafata llevan perlas.                                                           |  |  |
| 118 | La madre del niño está viendo algo en la pantalla mientras se bebe una bebida de naranja.   |  |  |
| 119 | El azafato le pide al protagonista que vuelva a su asiento tal y como le ha indicado Luisa. |  |  |
| 120 | La madre del niño lleva vaqueros y una blusa beige.                                         |  |  |
| 121 | Luisa lleva unos zapatos de cuña de color azul marino/negro.                                |  |  |
| 122 | El niño lleva unas orejas de plástico de Mickey Mouse.                                      |  |  |
| 123 | Mauro elige como menú la pasta.                                                             |  |  |
| 124 | El copiloto insulta a Mauro por los hechos acontecidos.                                     |  |  |
| 125 | Al notificar el comandante que regresan a Madrid, los pasajeros permanecen tranquilos.      |  |  |
| 126 | Luisa abre la puerta del baño donde está Mauro.                                             |  |  |
| 127 | Mauro lee una revista durante la noche.                                                     |  |  |
| 128 | El comandante y el copiloto llevan uniforme.                                                |  |  |
| 129 | La azafata tiene una tirita en el pie izquierdo.                                            |  |  |
| 130 | El plan de Mauro consiste en llegar a la cabina y hablar con el comandante.                 |  |  |
| 131 | Le ponen al niño un trozo de papel en la nariz para que pare de sangrar.                    |  |  |
| 132 | Luisa manipula (con el pie) el freno del carrito.                                           |  |  |
| 133 | Luisa le comenta al comandante que el niño y su madre van a Disney World.                   |  |  |
| 134 | La corbata del azafato es azul marina.                                                      |  |  |
| 135 | Mauro miente sobre lo sucedido (“el niño estaba jugando”).                                  |  |  |
| 136 | Luisa está perpleja, no se cree lo que está pasando.                                        |  |  |
| 137 | Los pasajeros de primera clase se unen a la revuelta.                                       |  |  |
| 138 | Luisa le explica a Mauro clara y abiertamente por qué dan la vuelta.                        |  |  |
| 139 | Las azafatas llevan una coleta blanca.                                                      |  |  |
| 140 | Mauro le pide a la azafata que le sirva pasta y pollo.                                      |  |  |

|     |                                                                                                              |  |  |
|-----|--------------------------------------------------------------------------------------------------------------|--|--|
| 141 | El menú que ofrece Luisa en el vuelo es de pasta o de pollo.                                                 |  |  |
| 142 | Luisa le pone una manta al niño.                                                                             |  |  |
| 143 | Muchos pasajeros empiezan a utilizar su teléfono móvil.                                                      |  |  |
| 144 | El niño lleva un pantalón largo azul marino                                                                  |  |  |
| 145 | Mauro les pide a la azafata y al azafato que se aparten para entrar en la cabina.                            |  |  |
| 146 | La azafata lleva chaleco.                                                                                    |  |  |
| 147 | Luisa le dice a uno de los pasajeros de primera clase "lo mejor para los mejores".                           |  |  |
| 148 | Luisa utiliza gafas de vista para leer.                                                                      |  |  |
| 149 | La madre del niño va al baño.                                                                                |  |  |
| 150 | La chica del asiento contiguo a Mauro pide pasta para comer.                                                 |  |  |
| 151 | El copiloto tiene perilla.                                                                                   |  |  |
| 152 | Germán apoya la idea de Mauro de ir hablar con el comandante.                                                |  |  |
| 153 | Mauro suplica y le pide disculpas a Luisa.                                                                   |  |  |
| 154 | Los pasajeros hablan y discuten sobre qué hacer cuando creen que el avión ha sido secuestrado por una banda. |  |  |
| 155 | Mauro dice al comandante y copiloto que él ha intentado detener la situación.                                |  |  |

**Muchas gracias por su colaboración.**
